# Supplementary material for: Single Copies of the 5S rRNA Inserted into 45S rDNA Intergenic Spacers in the Genomes of Nototheniidae (Perciformes, Actinopterygii)
Source: MDPI journal article supplement (doi:10.3390/ijms24087376), 2023-04-17

**Single copies of the 5S rRNA gene inserted into 45S rDNA intergenic spacers  
in the genomes of Nototheniidae (Perciformes, Actinopterygii)**

Alexander Dyomin, Svetlana Galkina, Arina Ilina, Elena Gaginskaya

Supplementary material

**Table S1.** rDNA elements found in genome sequences of Nototheniidae representatives

| Species                              | NCBI whole genome shotgun<br>sequence accession number | rDNA elements found<br>in the genome sequence  |
|--------------------------------------|--------------------------------------------------------|------------------------------------------------|
| Artedidraconinae                     |                                                        |                                                |
| <i>Histiodraco velifer</i>           | CALSCB010033685                                        | rDNA repeat partial                            |
| Bathydraconinae                      |                                                        |                                                |
| <i>Gymnodraco acuticeps</i>          | CADEHQ010011037                                        | rDNA repeat partial                            |
| Channichthyinae                      |                                                        |                                                |
| <i>Chaenocephalus aceratus</i>       | JAMFTG010002228                                        | 2 Full rDNA repeats                            |
| <i>Chionodraco myersi</i>            | RQJG01056976                                           | rDNA repeat partial                            |
| <i>Pseudochaenichthys georgianus</i> | CADEHP020001122                                        | rDNA repeat partial                            |
| Harpagiferinae                       |                                                        |                                                |
| <i>Harpagifer antarcticus</i>        | CADEHR010007419                                        | rDNA repeat partial                            |
| Dissostichinae                       |                                                        |                                                |
| <i>Dissostichus mawsoni</i>          | JAAKFY010000885                                        | 1 full rDNA repeats                            |
| <i>Dissostichus eleginoides</i>      | JAOVFM010000209                                        | 1 full rDNA repeats, 2 IGS                     |
| Trematominae                         |                                                        |                                                |
| <i>Trematomus loennbergii</i>        | JAAOOA010003522                                        | 1 full rDNA repeats, 1 partial<br>rDNA repeats |
| <i>Trematomus bernacchii</i>         | CADEHO010005942                                        | rDNA repeat partial                            |

**Figure S1.** IGS repeats in Nototheniidae. The alignment of consensus repeat sequences found for each species is presented.

Repeat NR1 found in Trematominae (*Trematomus loennbergii*, *T. bernacchii*), Dissostichinae (*Dissostichus mawsoni*, *D. eleginoides*), Channichthyinae (*Chionodraco myersi*, *Chaenocephalus aceratus*, *Pseudochaenichthys georgianus*), Bathydraconinae (*Gymnodraco acuticeps*), Harpagiferinae (*Harpagifer antarcticus*), Artedraconinae (*Histiodraco velifer*)

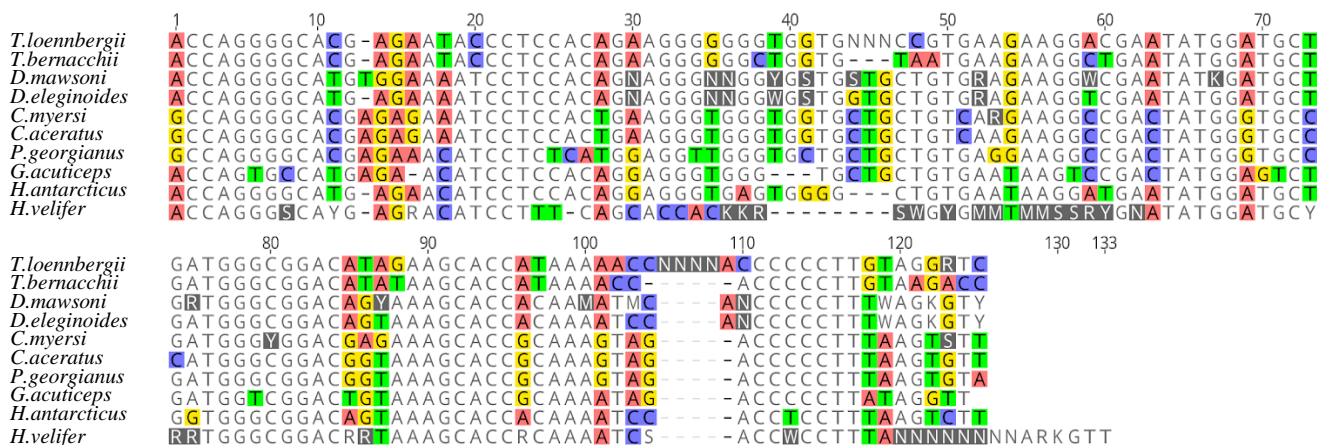

Repeat NR2 found in Trematominae (*Trematomus loennbergii*, *T. bernacchii*), Dissostichinae (*Dissostichus mawsoni*, *D. eleginoides*), Channichthyinae (*Chaenocephalus aceratus*, *Chionodraco myersi*, *Pseudochaenichthys georgianus*), Harpagiferinae (*Harpagifer antarcticus*), Artedraconinae (*Histiodraco velifer*)

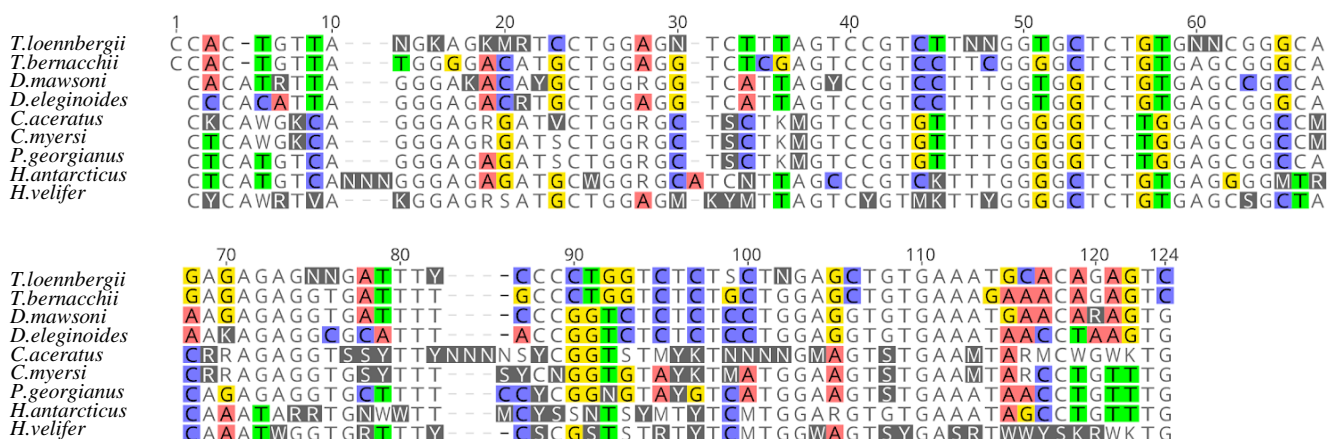

Repeat GR2 found in Bathydraconinae (*Gymnodraco acuticeps*)

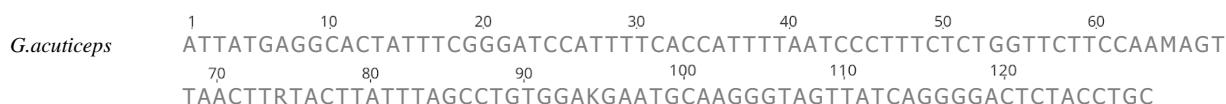

Repeat DR3 found in Dissostichinae (*Dissostichus mawsoni*, *D. eleginoides*)

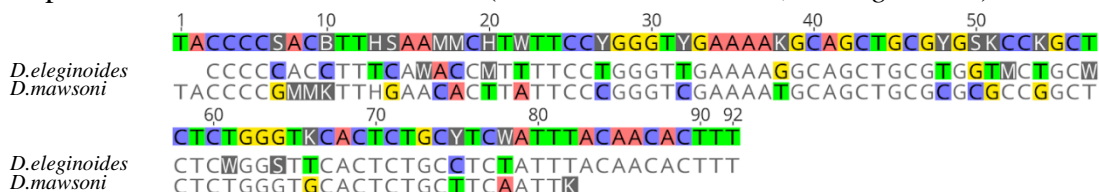

### Repeat TR3 found in Trematodinae (*Trematomus loennbergii*, *T. bernacchii*)

1 10 20 30 40 50 60  
*T.loennbergii* AAACATGTTMCCCCACWGTAAACACAGTTTACCTGTGTTTIGARGACTCTTCCGGG  
*T.bernacchii* AAACATGTTCCYCCACASTKTRACMCWGYTKTASCYRKSTTTYGAGSMYTCCTTTCCTGGG  
 70 80 90 100 110 120  
*T.loennbergii* TCAATGTGTCTCTCTTNNCCCCCTGGGTGTGTGTNNGAGACMAGTGAAGTGAGTCAG  
*T.bernacchii* TCAATGTGTCTCTTCTC-CCCCCTGGGTGTGTGT--GAGACAAGTCAAGTGAGTCAG  
 130 140 152  
*T.loennbergii* SCTGCCAACAAAGCAGCAGTGTGTGTGTCATTTT  
*T.bernacchii* SCTGCCAACAAAGCAGCAGTGTGTGTGTCATTTT

### Repeat CR3 found in Channichthyinae (*Chionodraco myersi*, *Chaenocephalus aceratus*, *Pseudochaenichthys georgianus*)

1 10 20 30 40 50 60  
*C.myersi* TTTTACCTTAA--AAACAGCTTTCTGCCCTGTAAATGATTTTAAT---CATT  
*C.aceratus* TTTTACCTTAA--AAACAGCTTTCTGCCCTGTAAATGATTTTAAT---CATT  
*P.georgianus* TATCTCCCTTAATTACAGCAAATCCATCTTTTNNACACTATTTATGGGTAAATNNNNNCATN  
 70 80 90 100 110 120 130  
*C.myersi* AY--ACCGTCATGGAGGAGCTGCAGGGACACTTTACCCGCTTTTAAACACCTTTTCATGGGT-AAAC  
*C.aceratus* AY--ACCGTCATGGAGGAGCTGCAGGGACACTTTACCCGCTTTTAAACACCTTTTCATGGGT-AAAC  
*P.georgianus* NNNWYACYGTMTKRAARGCTGCAGGACACTTTACCCGCTTTTAAACACCTTTTCATGGGTAAAC  
 140 150 160 170 180 190 200 205  
*C.myersi* AATCAATGATTTTCCGCCTGCTTTCCATCAGCACCCGCCAGTCATTTCAAACGGTTTCAAATCGTTT  
*C.aceratus* AATCAATGATTTTCCGCCTGCTTTCCATCAGCACCCGCCAGTCATTTCAAACGGTTTCAAATCGTTT  
*P.georgianus* AATCATKTATTTCCGCCTGCTTTCCATCAGCACCCGCCAGTCATTTCAAACGGTTTCAAATCGTTT

### Repeat DR4 found in Dissostichinae (*Dissostichus mawsoni*, *D. eleginoides*)

1 10 20 30 40 50 60  
*D.mawsoni* TACCCAGGWTCCARGCTMYYNCCYSGCTTTAATAGCTGTYYGYYGCCCTGGGAGTTS  
*D.eleginoides* TACCCAGGATCCAGCTATTTTCCCTGGCTTTTAAATAGCTGTGTGGCCCTGGGAGTCT  
 70 80 90 100 110 120 130 140 150  
*D.mawsoni* TACCCAGGATCCAGGCTTTTCCCTGGCTTTTAAATAGCTGTGTGGCCCTGGGAGTCT  
*D.eleginoides* TACCCAGGATCCAGGCTTTTCCCTGGCTTTTAAATAGCTGTGTGGCCCTGGGAGTCT  
 160 170 180 190 200 210 220 230  
*D.mawsoni* CCAYNNAASRCTGTTCACACAKWTSWTYCATCCRGGGGTGTATTTCAACCAWCTT  
*D.eleginoides* CCA--AAGCTSTGCACACGTTT

### Repeat CR4 found in Channichthyinae (*Chionodraco myersi*, *Chaenocephalus aceratus*, *Pseudochaenichthys georgianus*)

1 10 20 30 40 50 60 70  
*C.myersi* ATGAAATGGCCATATCTTCTTAAATTCACATCAMAATACCCAAGCTTTTACACACTAATTGGTGGGTAATGAGCC  
*C.aceratus* ATGAAATGGCCATATCTTCTTAAATTCACATCAMAATACCCAAGCTTTTACACACTAATTGGTGGGTAATGAGCC  
*P.georgianus* ATGAAATGGCCATATCTTCTTAAATTCACATCAMAATACCCAAGCTTTTACACACTAATTGGTGGGTAATGAGCC  
 80 90 100 110 120 130 140 150  
*C.myersi* ATGTGTACCTGTCTTTAAAGTAATTTTACCAGCTTTTACAGACCTAATTCCTGGGTAACAAAGTCACCCCTGGACCG  
*C.aceratus* ATGTGTACCTGTCTTTAAAGTAATTTTACCAGCTTTTACAGACCTAATTCCTGGGTAACAAAGTCACCCCTGGACCG  
*P.georgianus* ATGTGTACCTGTCTTTAAAGTAATTTTACCAGCTTTTACAGACCTAATTCCTGGGTAACAAAGTCACCCCTGGACCG  
 160 170 180 190 200 210 220 229  
*C.myersi* GTCATCAAAATGTGATTGAAATGGACAGATTCCTGTACATTTTCAATGCAATTTTAAATGGG-GTGGTGGTGG  
*C.aceratus* GTCATCAAAATGTGATTGAAATGGACAGATTCCTGTACATTTTCAATGCAATTTTAAATGGG-GTGGTGGTGG  
*P.georgianus* GTCATCAAAATGTGATTGAAATGGACAGATTCCTGTACATTTTCAATGCAATTTTAAATGGG-GTGGTGGTGG

### Repeat NR5 found in Dissostichinae (*Dissostichus mawsoni*, *D. eleginoides*), Trematodinae (*Trematomus loennbergii*), Channichthyinae (*Chaenocephalus aceratus*, *Chionodraco myersi*)

1 10 20 30 40 50 60 70  
*D.mawsoni* ACACCTCTTCTGCTGTTTCTCAA  
*D.eleginoides* AACACCCCTTTTGGCCYGGTTCTCAA  
*T.loennbergii* GACCCCTTTTCCCGRTTCTCAC  
*C.aceratus* CACCCCTTTTCTGGTTCTTCC  
*C.myersi* CACCCCTTTTCTGGTTCTTCCNAAAGNNANABACCTTTCTYDAAAAGTTAACTAGACCTTTCTGACTCT  
 80 90 100 110 120 130 140 150 158  
*D.mawsoni* GGAGGAAATGAGGGGAGTTGACAGGGGACTCTABCCGCTSYATGAGCACTATTTTGGGACCTTTTATCATTTT  
*D.eleginoides* GGAGGAAATGAGGGGAGTTGACAGGGGACTCTABCCGCTSYATGAGCACTATTTTGGGACCTTTTATCATTTT  
*T.loennbergii* GGAGGAAATGAGGGGAGTTGACAGGGGACTCTABCCGCTSYATGAGCACTATTTTGGGACCTTTTATCATTTT  
*C.aceratus* GGAGGAAATGAGGGGAGTTGACAGGGGACTCTABCCGCTSYATGAGCACTATTTTGGGACCTTTTATCATTTT  
*C.myersi* GGAGGAAATGAGGGGAGTTGACAGGGGACTCTABCCGCTSYATGAGCACTATTTTGGGACCTTTTATCATTTT





*Pseudochaenichthys georgianus* NCBI WGS CADEHK010005965

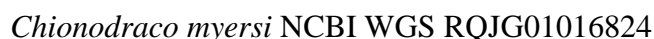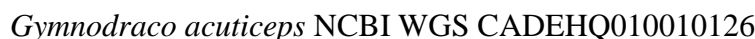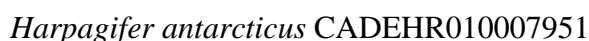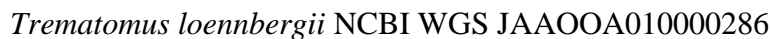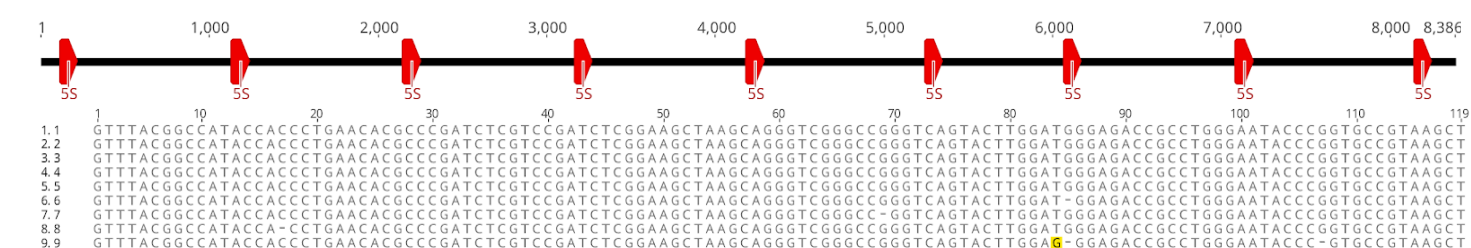



*Trematomus bernacchii* NCBI WGS CADEHO010006468

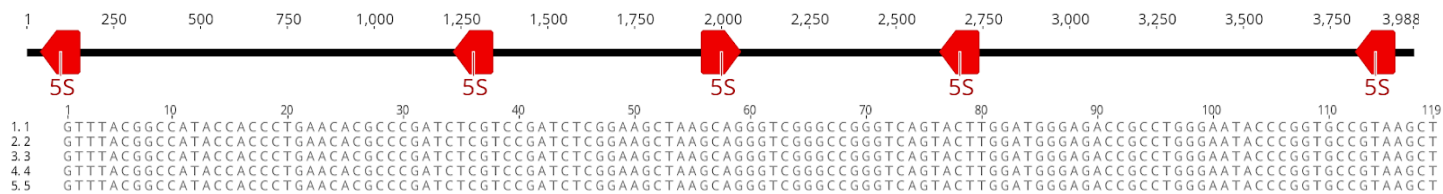

*Dissostichus eleginoides* NCBI WGS JAOVFM010000358

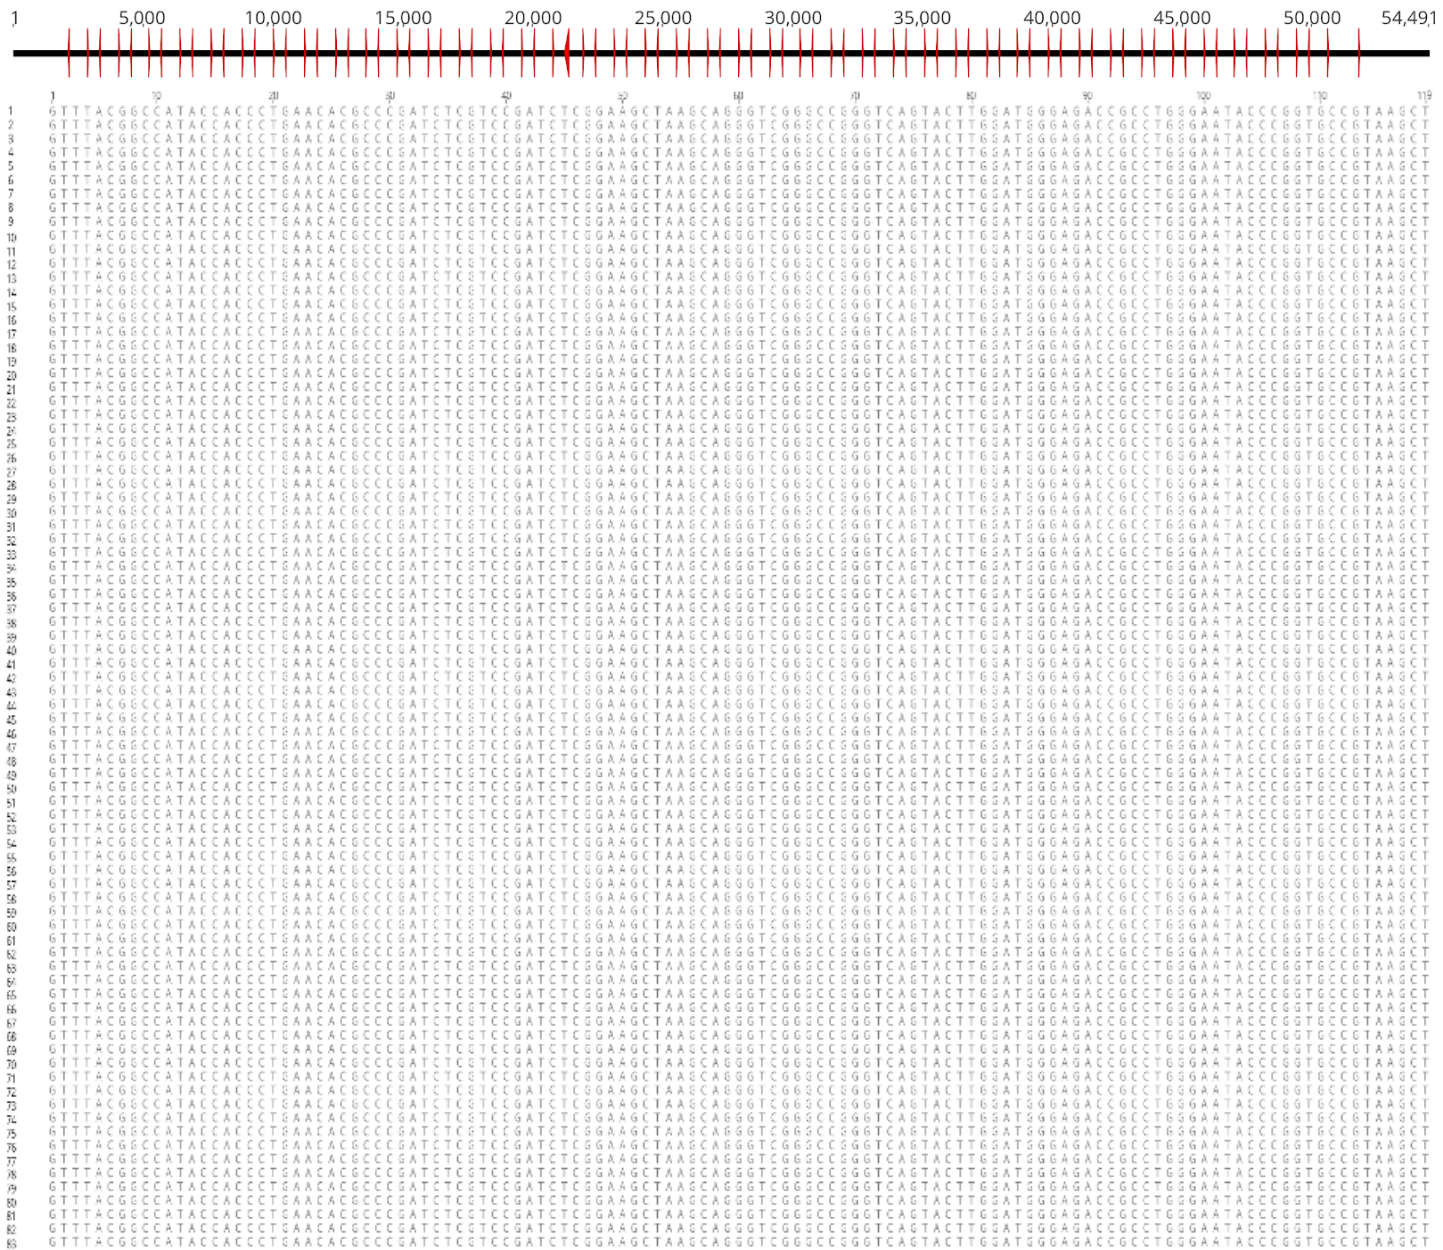

*Dissostichus mawsoni* NCBI WGS JAAKFY010000822

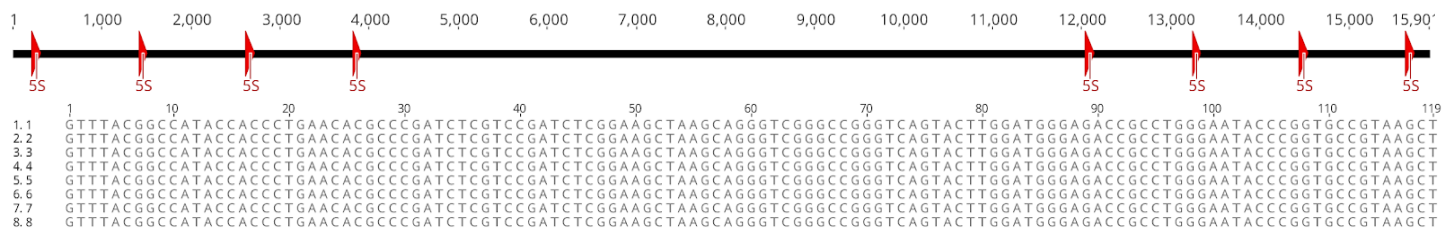

**Figure S4.** Different representation of the NOR-5S and NTS-5S rRNA sequencing reads in different tissue transcriptomes of *Dissostichus eleginoides* (Dissostichinae). Percentage of total 5S rRNA sequencing reads was calculated from NCBI BioProjects PRJNA864592 data.

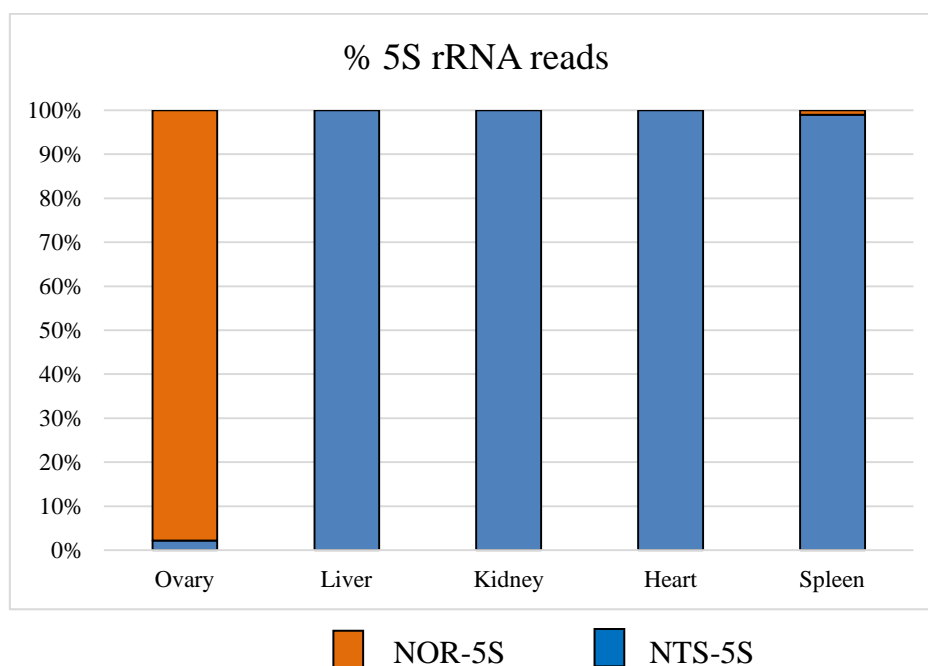

Supplement: s1 [file s1]
